# Supplementary material for: Gas-phase products from nitrate radical oxidation of five monoterpenes: insights from free-jet flow-tube experiments
Source: Copernicus journal article supplement (doi:10.5194/egusphere-2025-6255), 2025-12-27
Supplement: Supplementary file 1 [file egusphere-2025-6255-supplement.pdf]

## Section S1. The free-jet flow-tube experiments.

To minimize wall effects within the flow-tube, achieving laminar flow is essential. However, effective investigation of chemical reactions also requires thorough mixing of oxidants and reactants. Therefore, it is critical to select the total flow rate based on the length and inner diameter of the flow-tube, and to determine the injector flow rate according to the nozzle inner diameter. We adopted the flow-tube and injector design from a well-established free-jet flow system developed by Berndt et al. (2015b, a, 2016), including the same flow rates: 95 L min<sup>-1</sup> for the main flow and 5 L min<sup>-1</sup> for the injector. To help the main flow to be laminar before mixing with the injector stream, two stainless-steel meshes were installed to two stainless-steel rings: one near the large flange (fixed) and another supporting (and moving with) the injector (Fig. 1).

Computational fluid dynamics (CFD) simulations were performed using COMSOL Multiphysics (COMSOL, Inc.), including ozonolysis of 2,3-dimethyl-2-butene (TME). The results closely matched those reported by Berndt et al. (2015b): the central flow velocity increases to approximately 15 m s<sup>-1</sup> at the nozzle and then rapidly decreases. Based on the ozone (O<sub>3</sub>) concentration without chemical conversion, the complete mixing along the centerline is achieved around 0.3–0.4 m downstream the nozzle.

Due to the challenges in accurately modeling turbulent mixing, we conducted laminarity tests using smoke to visually assess the flow behavior under experimental conditions (videos are available as archived in Zenodo: <https://doi.org/10.5281/zenodo.17250833>; Zhang et al., 2025). Smoke was generated using a fluid smoke machine (OPTI MIST, Le Maitre Ltd) and blown at 23 L min<sup>-1</sup> to mix with 72 L min<sup>-1</sup> of zero air as the main flow. The tests show that after a thorough turbulent mixing, the flow became laminar approximately 40–50 cm downstream the nozzle.

Based on the smoke tests, we determined that the shortest reaction distance to be used was 50 cm. The effective reaction time was then experimentally determined from a reaction distance from 50 to 110 cm, using ozonolysis of TME (Berndt et al., 2015b). In the presence of excess of TME relative to O<sub>3</sub> ([O<sub>3</sub>]<sub>max</sub> = 9.5 × 10<sup>11</sup> cm<sup>-3</sup>, [TME] = (0.2 – 1.44) × 10<sup>14</sup> cm<sup>-3</sup>), the effective reaction time, *t*, was calculated using the expression:

$$\frac{[O_3]_{TME}}{[O_3]_0} = \exp(-[TME] \cdot k_{TME+O_3} \cdot t) \quad (S1)$$

assuming constant [TME] and using a rate coefficient of  $k_{TME+O_3} = 1 \times 10^{11} \text{ cm}^3 \text{ molecule}^{-1} \text{ s}^{-1}$  (Witter et al., 2002). The decay of O<sub>3</sub> was monitored by a photometric O<sub>3</sub> analyzer. After correcting for a 3 s residence time in the sampling line and O<sub>3</sub> analyzer, the effective reaction times at different distances were determined (Fig. S1): 2.5 s (50 cm), 4.6 s (70 cm), 6.4 s (90 cm), and 8.3 s (110 cm).

30 Compressed air supplied to the zero-air generator (ZA-737-250, Tisch Environmental) was filtered to remove particles and water vapors. After passing through the zero-air generator and mass flow controllers (MKS, Inc.), the main flow was further purified using adsorber containers (IAH-336A, Infiltec GmbH) filled with molecular sieves (9Å, IAC-510B, Infiltec GmbH), followed by HEPA filters (Whatman plc) to ensure particle-free conditions. During our experiments, throughout the flow-tube reaction distance, concentrations of O<sub>3</sub>, NO<sub>2</sub>, and monoterpenes (MTs) remained nearly constant, with conversion ratio generally below 1%, based on box model simulations (see Fig. S2 for example). Consequently, there was no particle present in our experiments, as the feed gas was particle-free and particle formation did not occur due to the low reactant conversion and short reaction time. This is consistent with earlier flow-tube experiments under similar conditions (Berndt et al., 2018).

## 40 Section S2 Instrumentation and quantification

The chemical ionization mass spectrometer (CIMS, ToFwerk AG/Aerodyne Research, Inc.) was coupled with an Eisele-type inlet (Eisele and Tanner, 1993). The sample flow is drawn in through a 3/4-inch stainless steel tube at 10 L min<sup>-1</sup>. A sheath flow is introduced at 20 L min<sup>-1</sup> to minimize wall losses, and it carries either diethylamine (DEA) or isotopically labeled nitric acid (H<sup>15</sup>NO<sub>3</sub>) across an X-ray source, generating either diethylammonium (C<sub>4</sub>H<sub>12</sub>N<sup>+</sup>) or nitrate (<sup>15</sup>NO<sub>3</sub><sup>-</sup>) ions. Nitrogen flows over DEA and H<sup>15</sup>NO<sub>3</sub> samples were at 10 ml min<sup>-1</sup> and 50 ml min<sup>-1</sup> respectively. In an electric field, the primary ion (or reagent ion) is guided towards the 10 L min<sup>-1</sup> sample flow, where ionization occurs via clustering with sampled molecules. The resulting charged clusters are directed through a critical orifice into an atmospheric pressure interface time-of-flight mass spectrometer (APi-TOF), where they are detected based on mass-to-charge ratios (m/z) (Junninen et al., 2010). For quantification of CIMS data, the concentration of the molecule X is defined as

$$[X] = C \times \frac{X \text{ ion signals}}{\text{reagent ion signals}} \quad (\text{S2})$$

In the case of H<sup>15</sup>NO<sub>3</sub> and DEA, the equations are shown as follows

$$[X] = C \times \frac{X \cdot \left( \sum_{j=0}^1 \sum_{i=0}^{1-j} (\text{HNO}_3)_i \cdot (\text{H}^{15}\text{NO}_3)_j \cdot \text{NO}_3^- + \sum_{j=0}^1 (\text{H}^{15}\text{NO}_3)_j \cdot {}^{15}\text{NO}_3^- \right)}{\sum_{j=0}^2 \sum_{i=0}^{2-j} (\text{HNO}_3)_i \cdot (\text{H}^{15}\text{NO}_3)_j \cdot \text{NO}_3^- + \sum_{j=0}^2 (\text{H}^{15}\text{NO}_3)_j \cdot {}^{15}\text{NO}_3^-} \quad (\text{S3})$$

$$[X] = C \times \frac{X \cdot \text{C}_4\text{H}_{12}\text{N}^+}{\text{C}_4\text{H}_{12}\text{N}^+ + \text{C}_4\text{H}_{11}\text{N} \cdot \text{C}_4\text{H}_{12}\text{N}^+} \quad (\text{S4})$$

The numerators in equations S3 and S4 are the measured signal intensities of the molecule X clustered by primary ions. In nitrate mode, we saw monomer (e.g., <sup>15</sup>NO<sub>3</sub><sup>-</sup>) or dimer (e.g., H<sup>15</sup>NO<sub>3</sub>·<sup>15</sup>NO<sub>3</sub><sup>-</sup>) charged clusters, while in DEA mode, we mostly saw monomer (i.e., C<sub>4</sub>H<sub>12</sub>N<sup>+</sup>) charged ones. Note that in nitrate mode, we also observed adduct products with <sup>14</sup>N nitrates, which were also included in equation S3. This occurred because the NO<sub>2</sub> cylinder also produced HNO<sub>3</sub> into our setup. Nevertheless, the <sup>15</sup>N-labeled reagent ions consistently dominated the ionization pathways for the detected products in all experiments. The denominator in both equations (S3 and S4) corresponds to the total signal intensity of reagent ions. A calibration factor (C) is required to convert normalized signals to concentrations. Due to lack of an independent synthesis route for generation of RO<sub>2</sub> radicals and closed-shell products, a calibration factor of 7.3 × 10<sup>9</sup> cm<sup>-3</sup> (± 50%) was estimated from the sulfuric acid calibration experiments (He et al., 2023; Kürten et al., 2012). This approach has also been applied and validated in previous studies (Berndt et al., 2018, 2025), but possible differences in mass transmission of the instruments can cause additional uncertainties for larger organic molecules.

The Vocus proton-transfer-reaction time-of-flight mass spectrometer (Vocus PTR-TOF, ToFwerk AG) consists of two main components: the Vocus chemical ionization source and a standard time-of-flight mass spectrometer (HTOF). The Vocus consists of a discharge reagent-ion source and a focusing ion-molecule reactor (FIMR), for  
70 use in PTR-TOF measurements of volatile organic compounds (VOCs) (Krechmer et al., 2018). The reagent-ion source uses a low-pressure discharge to produce hydronium ions ( $\text{H}_3\text{O}^+$ ), which are directed into the FIMR. Sample air enters the FIMR through a short (10 mm) PEEK tube with an internal diameter of 0.18 mm, acting as a pressure restriction similar to a critical orifice. VOCs in the sample air are ionized via proton-transfer-reactions and then detected by the HTOF. Further instrumental details are available in Krechmer et al. (2018). Calibration was  
75 performed using a gas-phase standard from a calibration cylinder (Apel-Riemer Environmental, Inc.) containing 19 VOC components, including  $\alpha$ -pinene (AP). The sensitivity of AP was approximately 781 cps ppb<sup>-1</sup>. When the syringe pump system was set to deliver 80 ppb of AP, the Vocus PTR-TOF measured 84 ppb, confirming the accuracy of the syringe pump system. Since the proton-transfer rate constants between hydronium ions and different monoterpenes are quite similar (Zhao and Zhang, 2004), we expect the initial MT concentrations to have an  
80 uncertainty of no more than about 20%. This syringe pump system was also used to inject other four MTs and TME at specific rates based on target concentrations.

The concentrations of  $\text{NO}_2$  and  $\text{O}_3$  were measured by gas monitors. A photometric  $\text{O}_3$  analyzer (model 400, Teledyne API) was used to detect  $\text{O}_3$  in the free-jet flow-tube. The amount of  $\text{O}_3$  determines how much of a 254 nm UV light signal is absorbed in the sample cell. The absorption difference between the intact sample air and the  
85  $\text{O}_3$ -removed air, achieved by a switching valve periodically, enables the determination of the stable  $\text{O}_3$  concentrations.  $\text{NO}_2$  was measured using an  $\text{NO-NO}_2$  analyzer (model T200UP, Teledyne API). With a high-efficiency photolytic converter,  $\text{NO}_2$  is transformed to  $\text{NO}$  with minimal interference from other gases. Using the chemiluminescence detection principle,  $\text{NO}$  is measured by reacting with  $\text{O}_3$ , yielding light in direct proportion to the amount of  $\text{NO}$  (Archer et al., 1995). In this way, both sampled  $\text{NO}$  and total  $\text{NO}_x$  can be measured, without and  
90 with using the photolytic converter, respectively. This enables the determination of the  $\text{NO}_2$  concentration in the sample by subtraction.

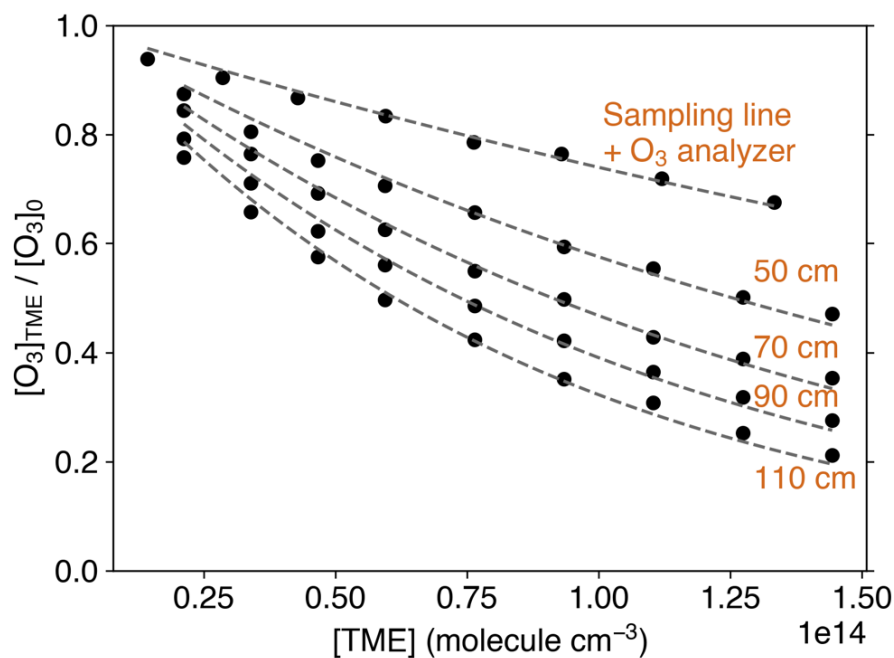

Figure S1. Determination of the reaction time for different reaction distances between the nozzle and the sampling port (50 – 110 cm) by measuring the decay of O<sub>3</sub> from its reaction with excessive TME: 2.5 s (50 cm), 4.6 s (70 cm), 6.4 s (90 cm), and 8.3 s (110 cm). Details see Section S1.

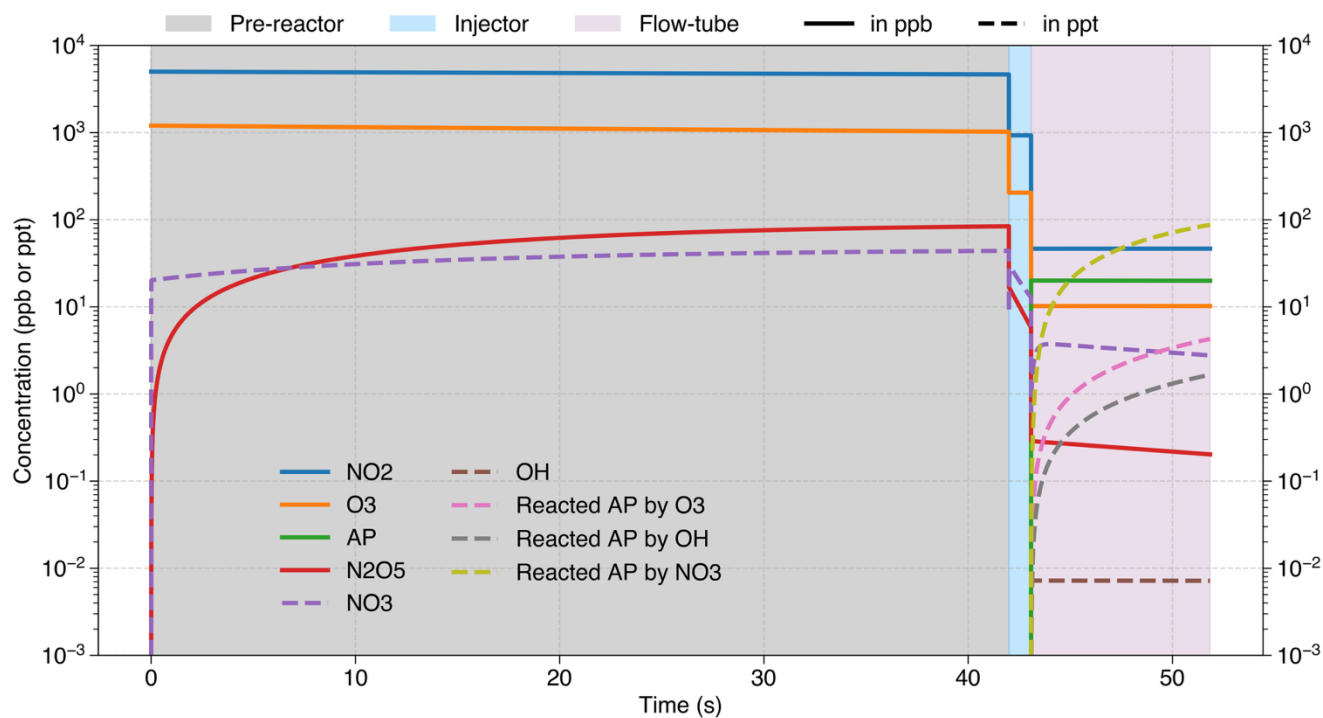

100 **Figure S2.** Time series of modeled compounds in the experiment with initial concentrations (in  $100 \text{ L min}^{-1}$ ) of AP,  $\text{O}_3$ , and  $\text{NO}_2$  at 20, 12, and 50 ppb (stage 6 in Fig. 2). In the pre-reactor (total flow:  $1 \text{ L min}^{-1}$ ), initial concentrations of  $\text{O}_3$ , and  $\text{NO}_2$  are 1200 and 5000 ppb. The reaction times are: 42 s (pre-reactor), 1.086 s (injector), and 8.8 s (flow-tube including the sampling inlet).

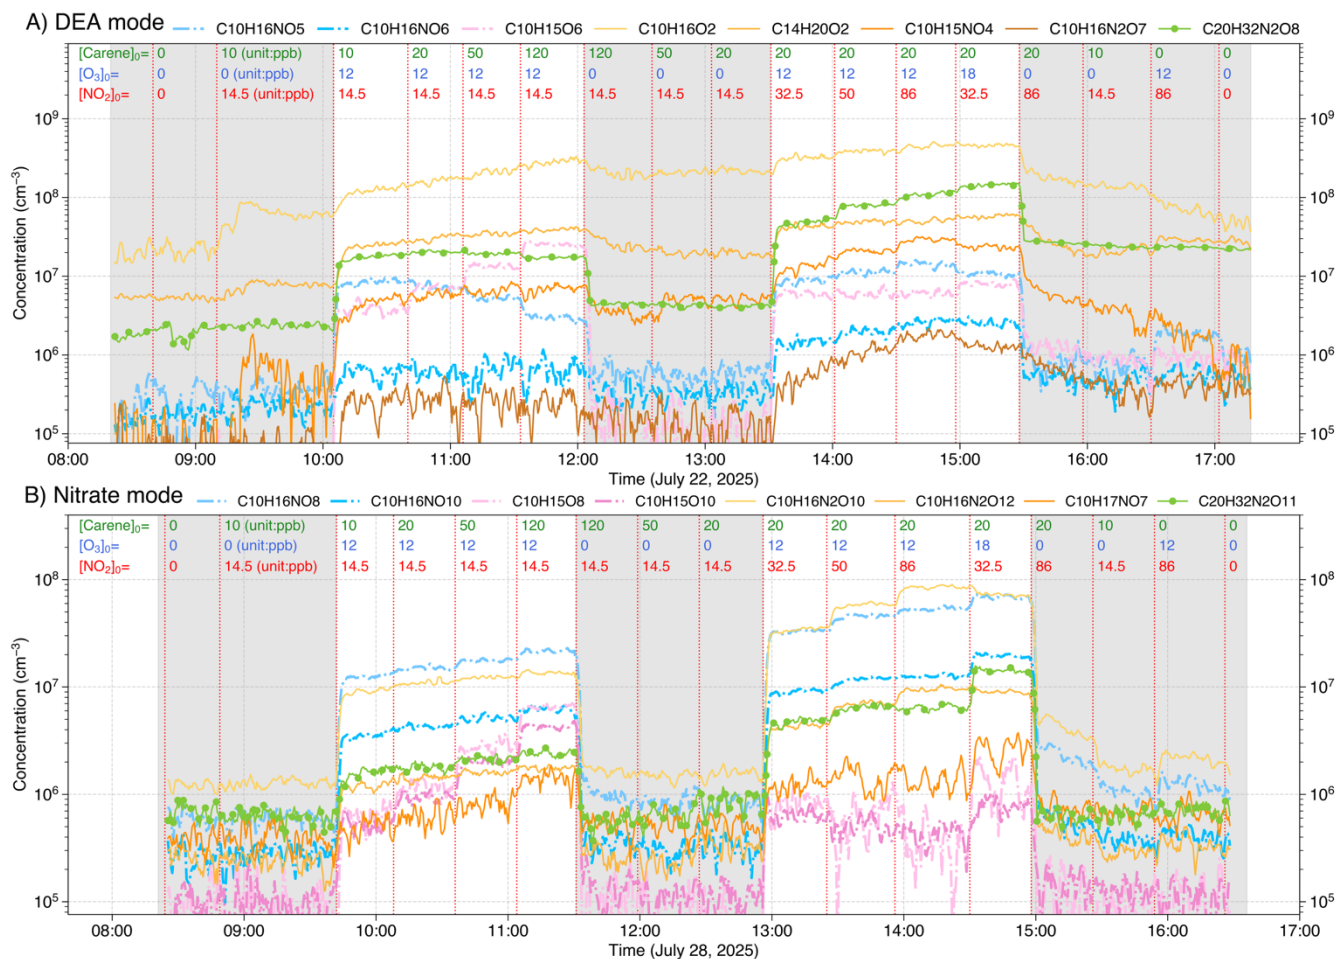

**Figure S3. Timeseries of major products from  $\Delta$ -3-carene + NO<sub>3</sub> experiments measured using both DEA (panel A) and nitrate (panel B) modes. Concentrations (in cm<sup>-3</sup>) of radicals, closed-shell monomers, and closed-shell dimers are shown as dash-dot lines, solid lines, and solid lines with markers, respectively. Products are color-coded by origin: expected NO<sub>3</sub> oxidation products (radicals, closed-shell monomers, and dimers) are shown in blue, yellow-orange, and green colors, respectively, while expected O<sub>3</sub>/OH oxidation products are shown in pink. Grey shaded areas represent background stages. Initial precursor concentrations (in ppb) shown above each subplot correspond to values present in the total flow of 100 L min<sup>-1</sup>, without any chemical conversion. The effective reaction time is 8.8 s.**

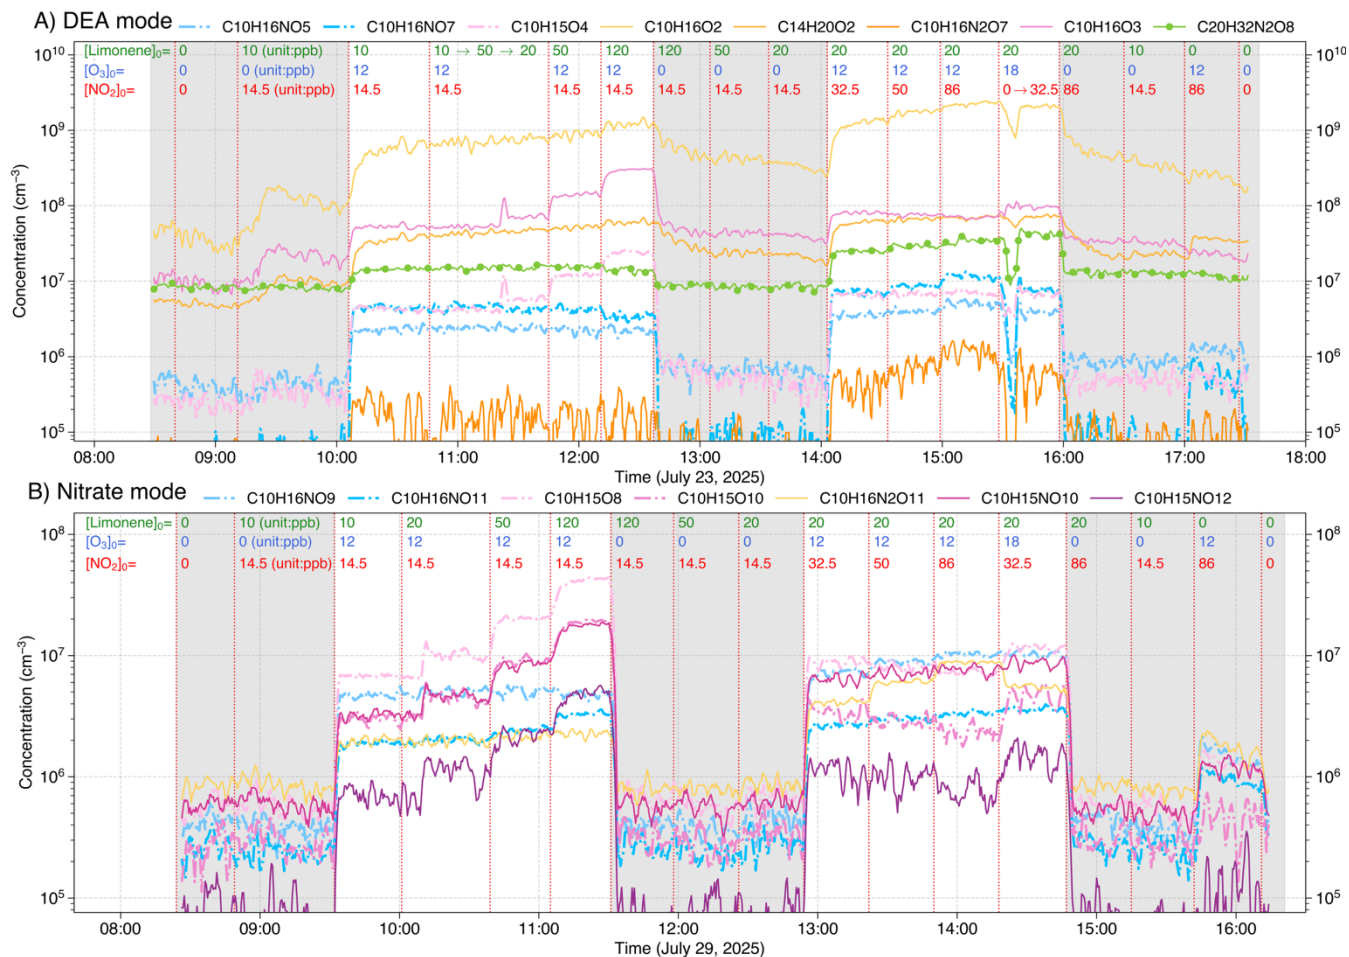

**Figure S4.** Timeseries of major products from limonene + NO<sub>3</sub> experiments measured using both DEA (panel A) and nitrate (panel B) modes. Concentrations (in cm<sup>-3</sup>) of radicals, closed-shell monomers, and closed-shell dimers are shown as dash-dot lines, solid lines, and solid lines with markers, respectively. Products are color-coded by origin: expected NO<sub>3</sub> oxidation products (radicals, closed-shell monomers, and dimers) are shown in blue, yellow-orange, and green colors, respectively, while expected O<sub>3</sub>/OH oxidation products are shown in pink. Grey shaded areas represent background stages. Initial precursor concentrations (in ppb) shown above each subplot correspond to values present in the total flow of 100 L min<sup>-1</sup>, without any chemical conversion. The effective reaction time is 8.8 s.



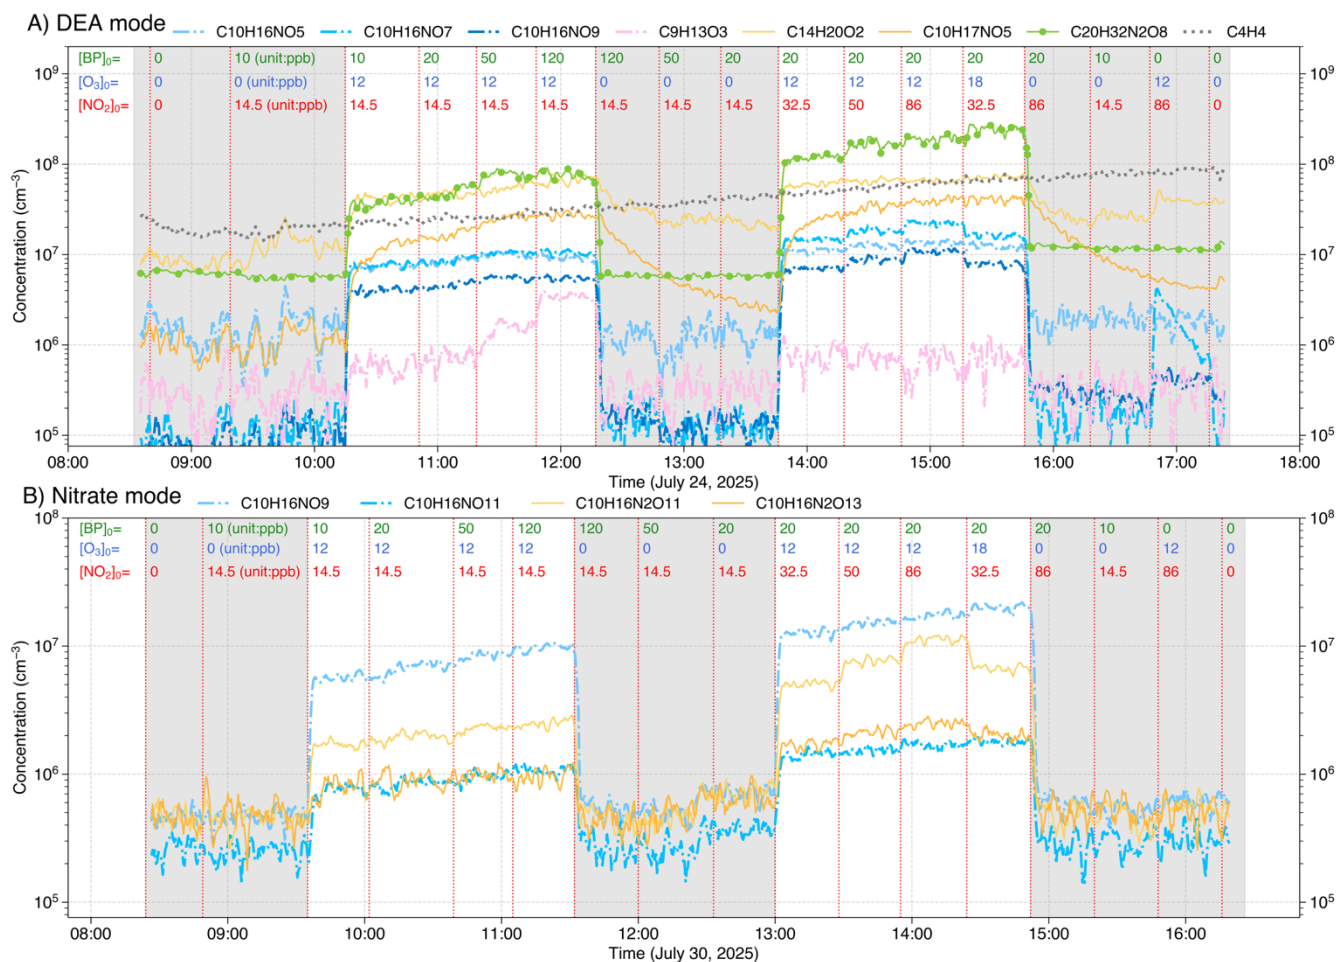

**Figure S5. Timeseries of major products from  $\beta$ -pinene (BP) + NO<sub>3</sub> experiments measured using both DEA (panel A) and nitrate (panel B) modes. Concentrations (in cm<sup>-3</sup>) of radicals, closed-shell monomers, and closed-shell dimers are shown as dash-dot lines, solid lines, and solid lines with markers, respectively. Products are color-coded by origin: expected NO<sub>3</sub> oxidation products (radicals, closed-shell monomers, and dimers) are shown in blue, yellow-orange, and green colors, respectively, while expected O<sub>3</sub>/OH oxidation products are shown in pink. Grey shaded areas represent background stages. Initial precursor concentrations (in ppb) shown above each subplot correspond to values present in the total flow of 100 L min<sup>-1</sup>, without any chemical conversion. The effective reaction time is 8.8 s.**

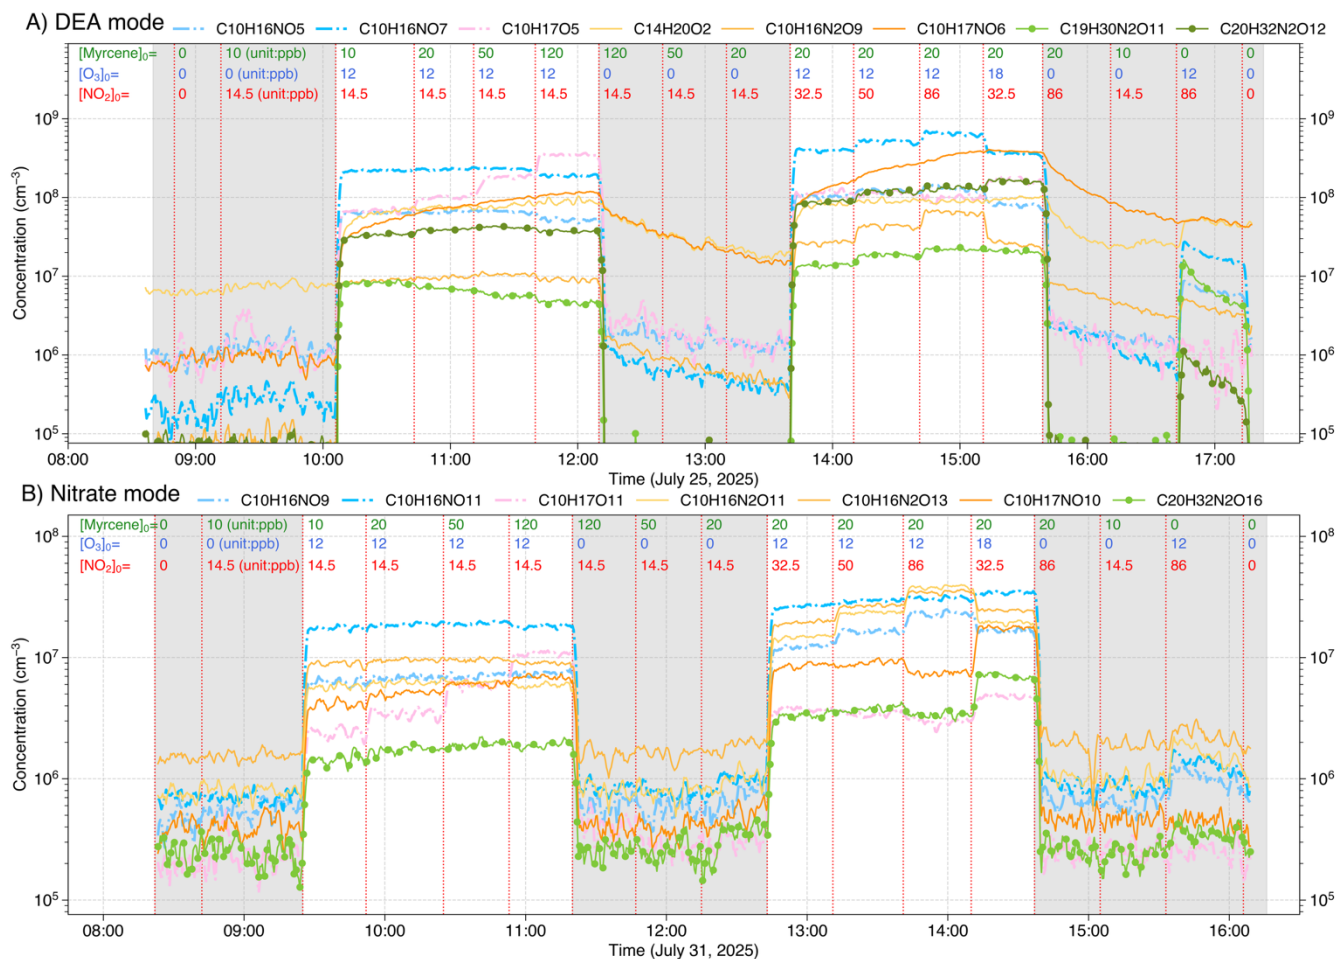

**Figure S6. Timeseries of major products from  $\beta$ -myrcene + NO<sub>3</sub> experiments measured using both DEA (panel A) and nitrate (panel B) modes. Concentrations (in cm<sup>-3</sup>) of radicals, closed-shell monomers, and closed-shell dimers are shown as dash-dot lines, solid lines, and solid lines with markers, respectively. Products are color-coded by origin: expected NO<sub>3</sub> oxidation products (radicals, closed-shell monomers, and dimers) are shown in blue, yellow-orange, and green colors, respectively, while expected O<sub>3</sub>/OH oxidation products are shown in pink. Grey shaded areas represent background stages. Initial precursor concentrations (in ppb) shown above each subplot correspond to values present in the total flow of 100 L min<sup>-1</sup>, without any chemical conversion. The effective reaction time is 8.8 s.**

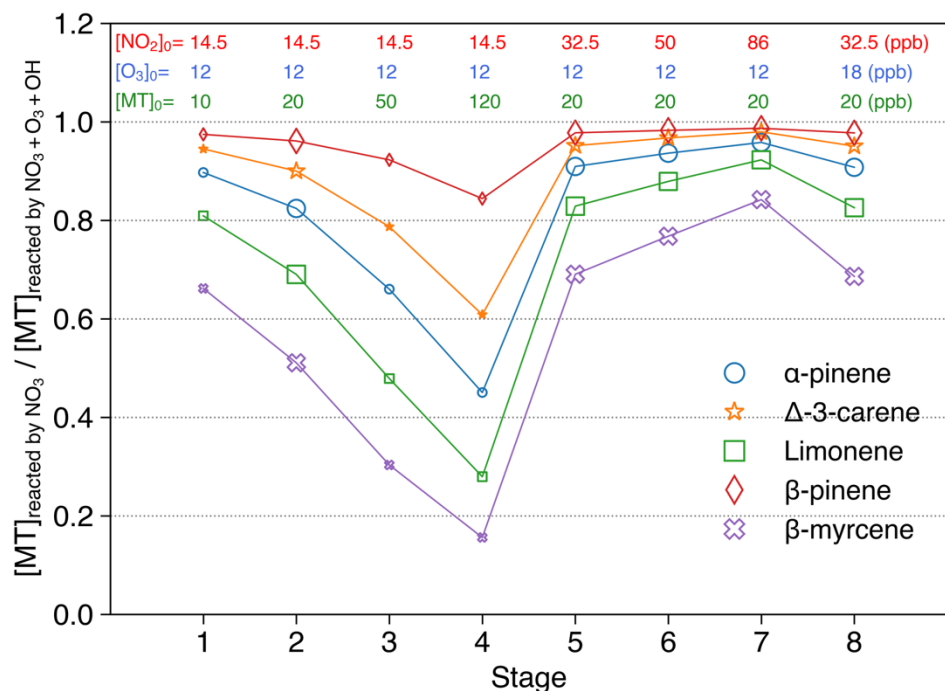

135 **Figure S7.** Ratio of reacted [MT] by  $\text{NO}_3$  to total reacted [MT] by  $\text{NO}_3$ ,  $\text{O}_3$ , and OH, as a function of experimental stage. Different marker shapes and colors represent different MTs. Initial precursor concentrations (in ppb) shown above each subplot correspond to values present in the total flow of  $100 \text{ L min}^{-1}$ , without any chemical conversion. Stages 2, 5, 6, 7, and 8 (indicated by larger markers) were selected for studying  $\text{NO}_3$  oxidation products, as these stages have a constant initial MT concentration of 20 ppb while systematically varying the  $\text{NO}_2/\text{O}_3$  conditions.

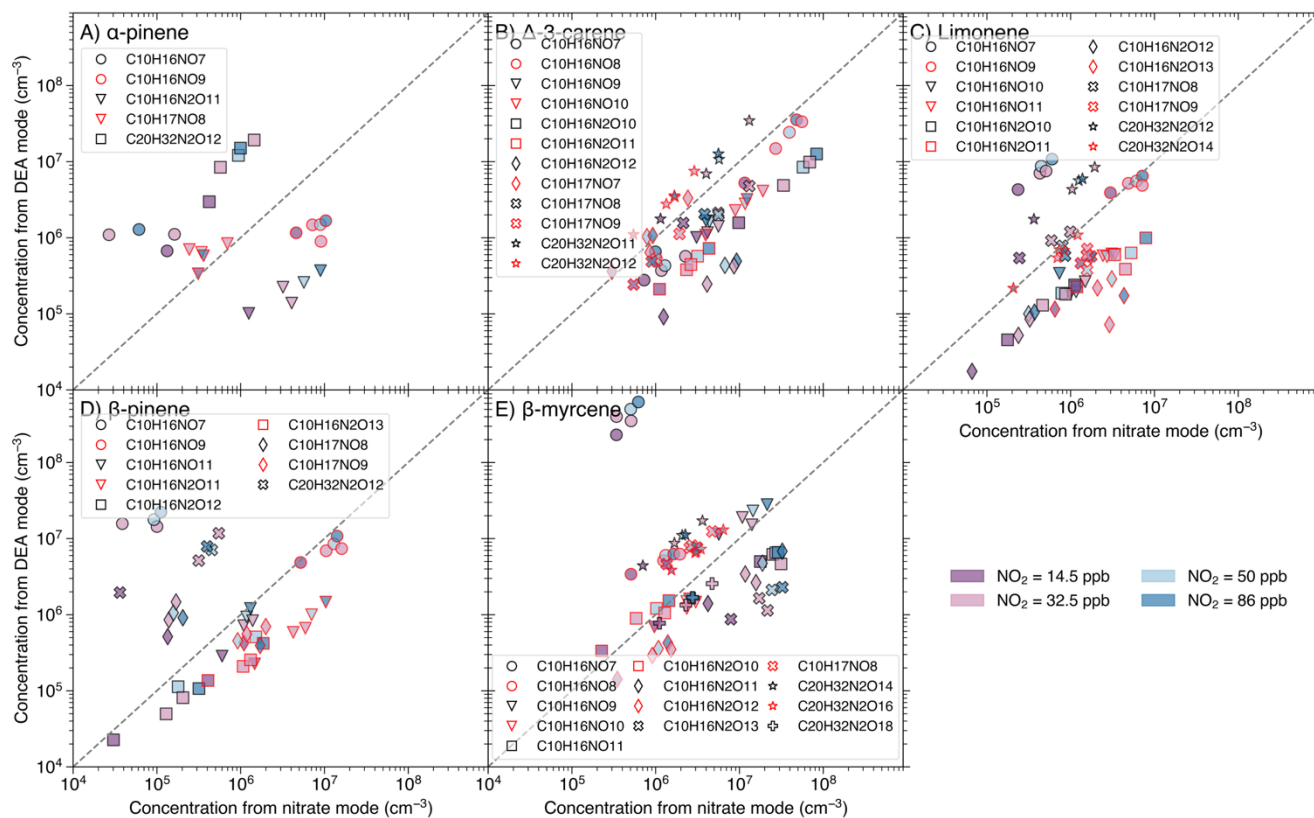

**Figure S8.** The comparison of major  $\text{NO}_3$  oxidation product (monomers with  $\text{O} \geq 7$ , dimers with  $\text{O} \geq 11$ , and peroxy nitrates with  $\text{O} \geq 10$ ) concentrations from both DEA and nitrate mode. The marker face colors indicate the initial  $\text{NO}_2$  levels of experimental stages while shapes and edge colors indicate individual compounds.

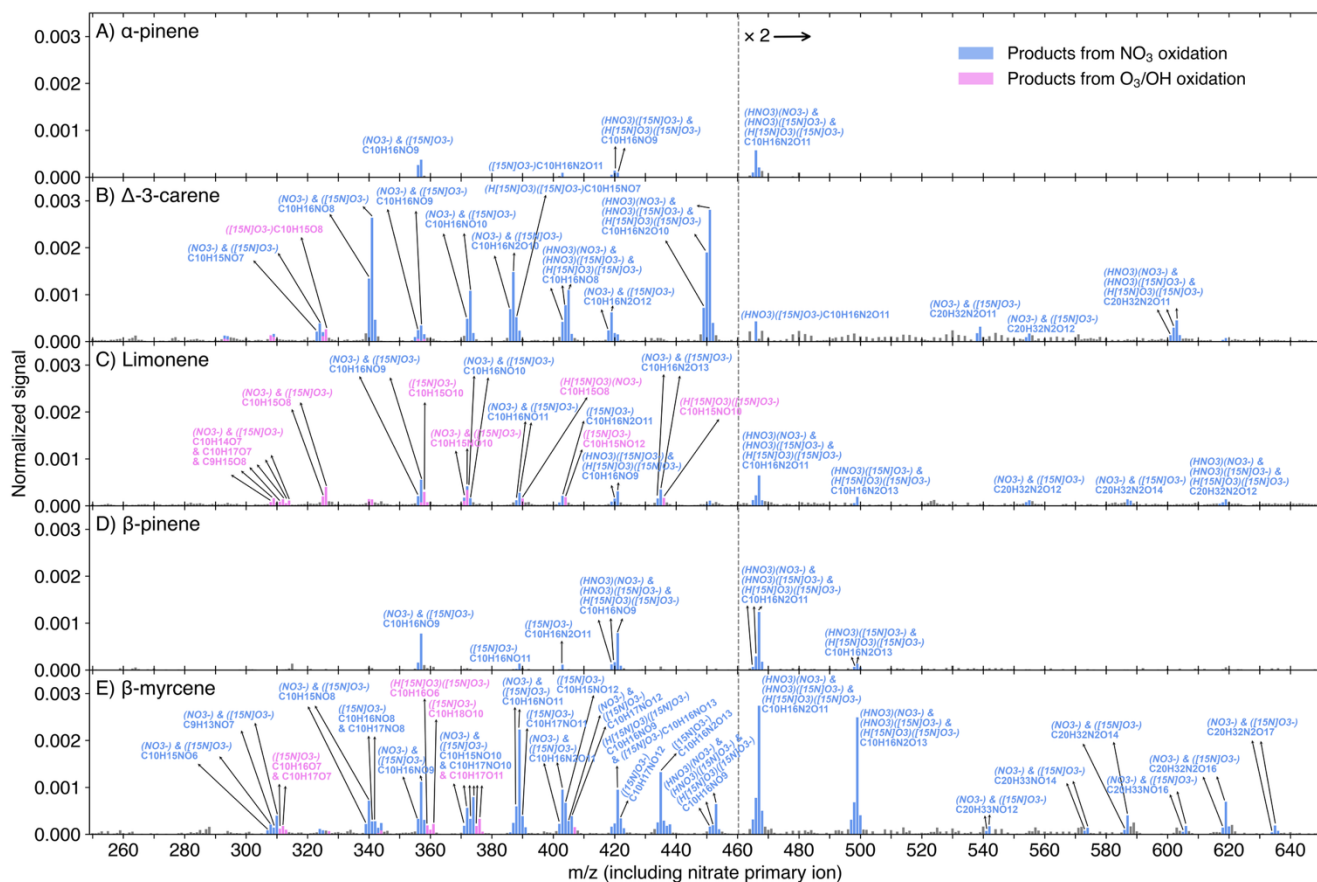

145 **Figure S9. Nitrate-CIMS spectra (10 min average) of MT + NO<sub>3</sub> reactions at the experimental stage 6, with detailed charging schemes displayed in the parentheses. Initial concentrations were [MT]<sub>0</sub> = 20 ppb, [O<sub>3</sub>]<sub>0</sub> = 12 ppb, and [NO<sub>2</sub>]<sub>0</sub> = 50 ppb, with an effective reaction time of 8.8 s. The spectra display the normalized peak signals (see Equation S3) and were corrected by subtracting background signals. Blue bars represent products (including both radicals and closed-shell species) from NO<sub>3</sub> oxidation, pink bars show products from O<sub>3</sub> or OH oxidation, and grey bars are for peaks not of interest. Peaks larger than 460 Th are multiplied by 2.**

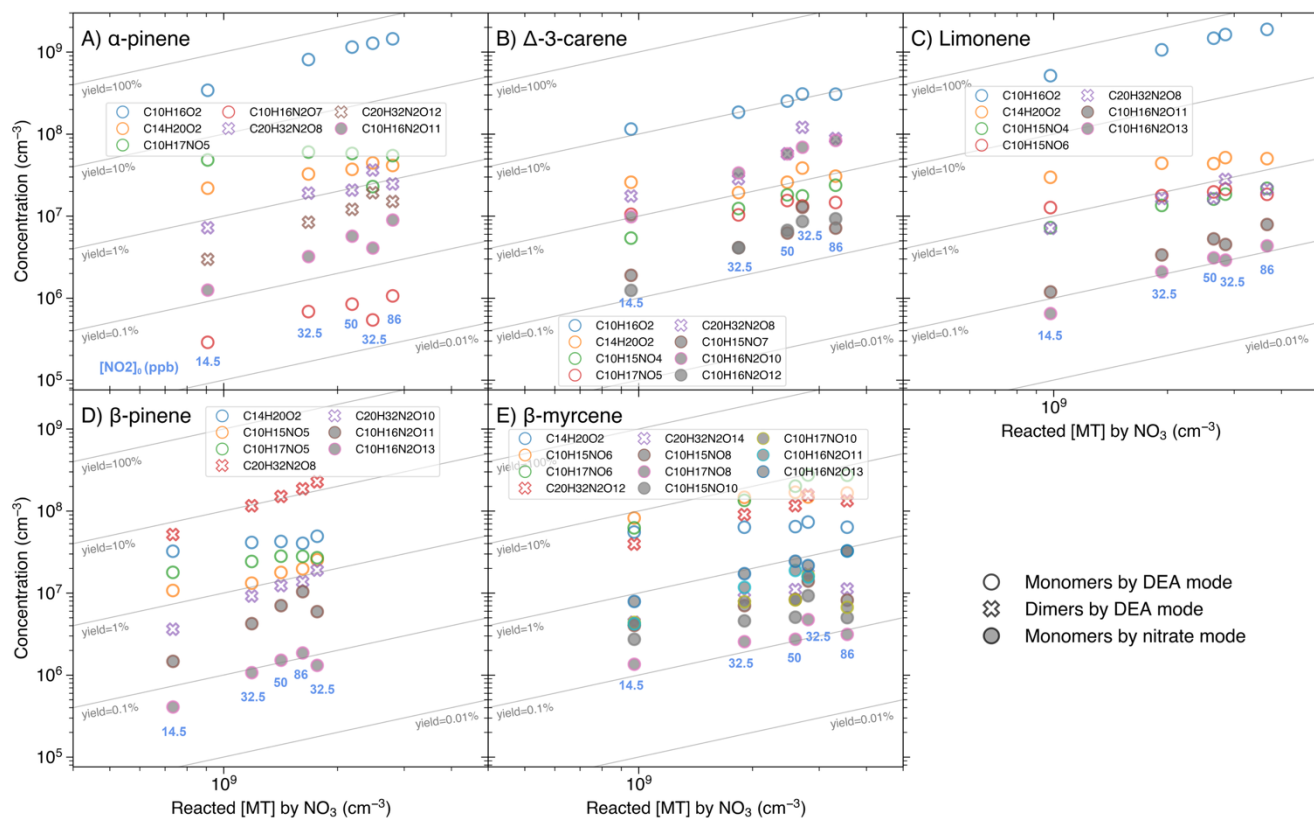

**Figure S10.** Concentrations (in  $\text{cm}^{-3}$ ) of the major closed-shell products from the MTs +  $\text{NO}_3$  reaction, as a function of reacted [MT] by the  $\text{NO}_3$  radical. Data from experimental stages 2 and 5–8 are presented as 10 min averaged measurements taken at an effective reaction time of 8.8 s. The reacted [MT] by  $\text{NO}_3$  was varied primarily by increasing  $[\text{NO}_2]_0$  (values in ppb shown beneath each column). The only exception is the transition from stage 7 to stage 8, where  $[\text{O}_3]_0$  increased from 12 to 18 ppb and  $[\text{NO}_2]_0$  decreased from 86 to 34.5 ppb (see Fig. 2). Circles represent monomers measured by the DEA mode, crosses represent dimers measured by the DEA mode, and filled circles represent monomers by the nitrate mode.

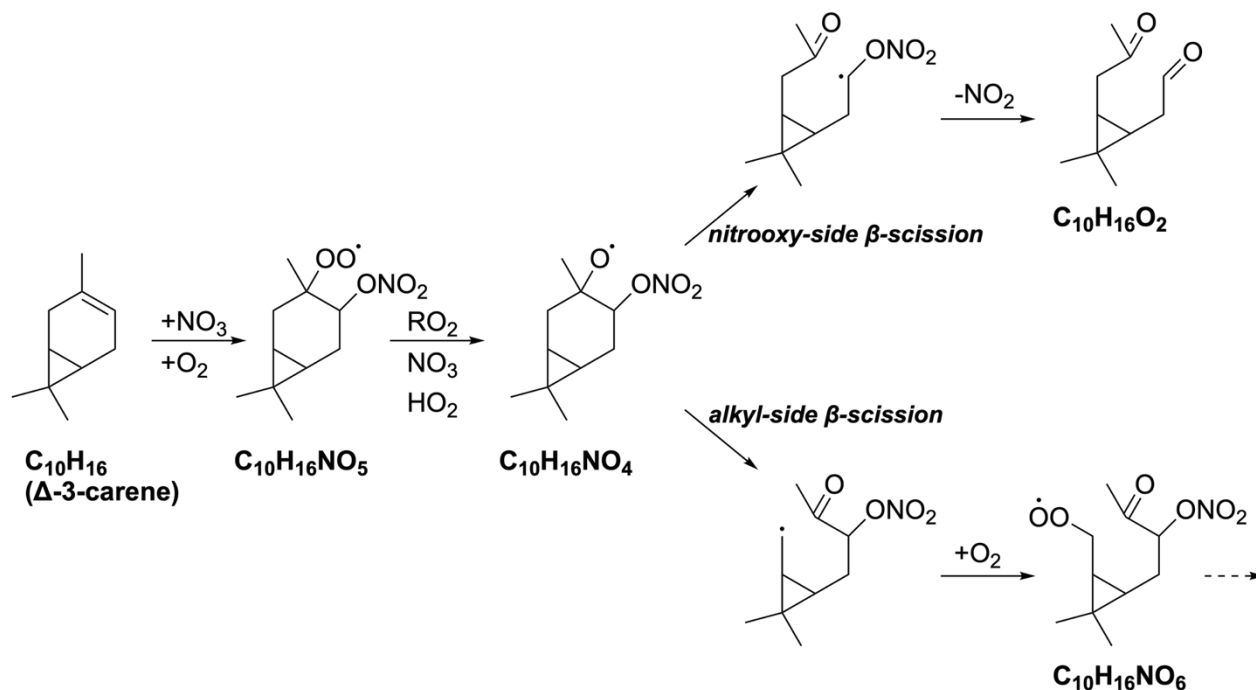

Figure S11. Schematic showing two competing RO scission pathways of the nitrooxy alkoxy radical,  $C_{10}H_{16}NO_4$ , originating from the  $\Delta$ -3-carene +  $NO_3$  reaction. The nitrooxy-side  $\beta$ -scission leads to the formation of  $C_{10}H_{16}O_2$  while the alkyl-side  $\beta$ -scission promotes further autoxidation (Draper et al., 2019; Kurtén et al., 2017). The RO scission pathways for  $\alpha$ -pinene and limonene follow the same pattern.

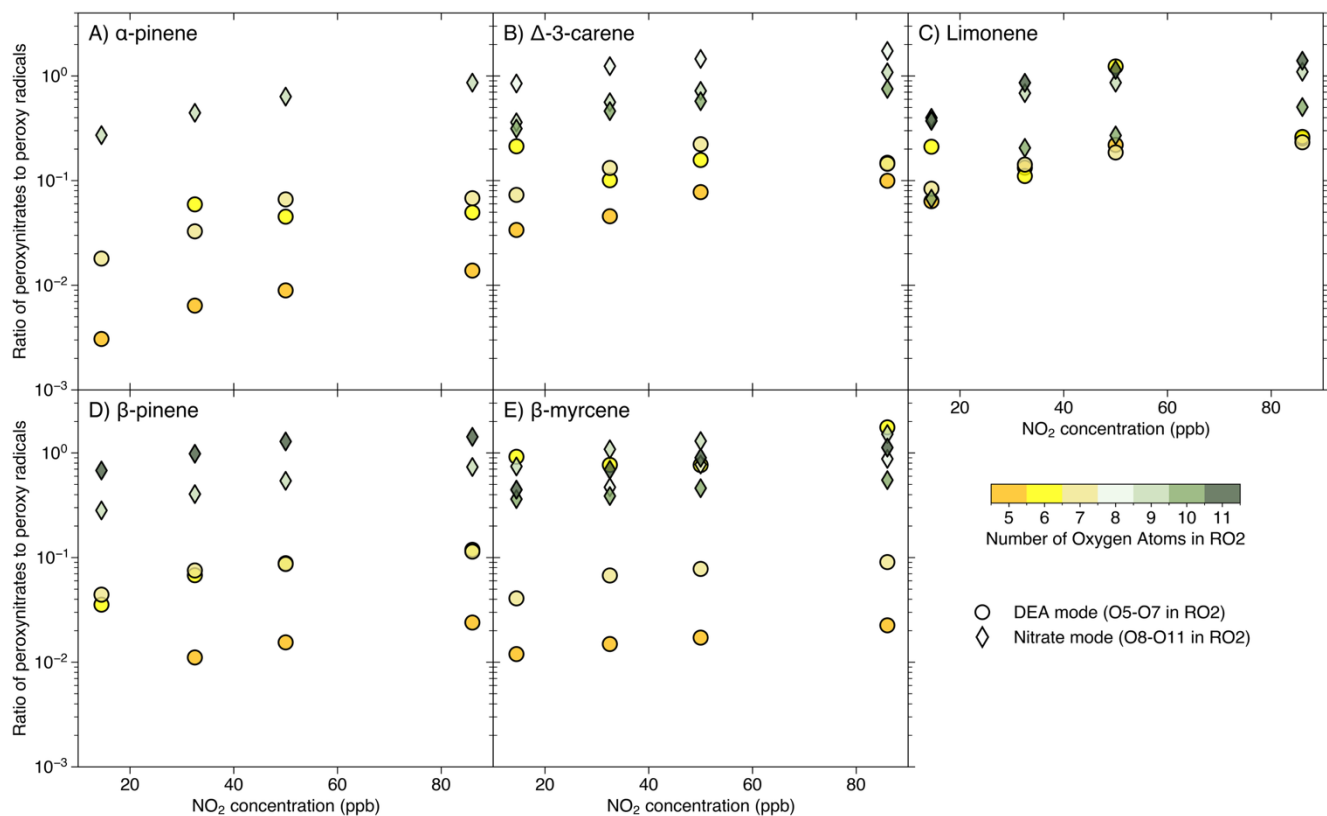

Figure S12. Ratio of peroxy nitrates ( $\text{RO}_2\text{NO}_2$ ) to their parent peroxy radicals ( $\text{RO}_2$ ), as a function of initial  $\text{NO}_2$  concentration ( $[\text{NO}_2]_0$ ). Data from experimental stages 2 and 5–7 are presented as 10 min averaged measurements taken at an effective reaction time of 8.8 s. The  $\text{RO}_2$  radicals with  $\text{O} = 5$  to 7 and their corresponding  $\text{RO}_2\text{NO}_2$  are measured from the DEA mode (their ratio presented in circles), while  $\text{RO}_2$  with  $\text{O} = 8$  to 11 and their  $\text{RO}_2\text{NO}_2$  are measured from the nitrate mode (their ratio presented in diamonds). Data points are colored according to the number of oxygen atoms in the parent  $\text{RO}_2$  radical.



**Table S1.** Reactions and their reaction rate coefficients used for the box model describing the flow-tube experiments. Rate coefficients at  $298 \pm 2$  K were taken from literature or estimated based on reported values.

| Reactions                                                           | Rate coefficients <sup>a</sup> | Reference                                                                                       |
|---------------------------------------------------------------------|--------------------------------|-------------------------------------------------------------------------------------------------|
| Alpha-pinene + NO <sub>3</sub> → products                           | $6.2 \times 10^{-12}$          | (Atkinson et al., 1984; Barnes et al., 1990)                                                    |
| Delta-3-Carene + NO <sub>3</sub> → products                         | $9.1 \times 10^{-12}$          |                                                                                                 |
| Limonene + NO <sub>3</sub> → products                               | $1.2 \times 10^{-11}$          |                                                                                                 |
| Beta-pinene + NO <sub>3</sub> → products                            | $2.5 \times 10^{-12}$          |                                                                                                 |
| Myrcene + NO <sub>3</sub> → products                                | $1.1 \times 10^{-11}$          | (Atkinson et al., 1984; Martínez et al., 1999)                                                  |
| Alpha-pinene + O <sub>3</sub> → $0.8 \times$ OH + products          | $9.6 \times 10^{-17}$          | (Aschmann et al., 2002; Atkinson et al., 1990, 1992; Bernard et al., 2012; Witter et al., 2002) |
| Delta-3-Carene + O <sub>3</sub> → $0.86 \times$ OH + products       | $4.9 \times 10^{-17}$          |                                                                                                 |
| Limonene + O <sub>3</sub> → $0.66 \times$ OH + products             | $2.2 \times 10^{-16}$          |                                                                                                 |
| Beta-pinene + O <sub>3</sub> → $0.3 \times$ OH + products           | $1.9 \times 10^{-17}$          |                                                                                                 |
| Myrcene + O <sub>3</sub> → $0.63 \times$ OH + products              | $4.7 \times 10^{-16}$          |                                                                                                 |
| Alpha-pinene + OH → products                                        | $5.3 \times 10^{-11}$          | (Atkinson et al., 1986; Gill and Hites, 2002)                                                   |
| Limonene + OH → products                                            | $1.6 \times 10^{-10}$          |                                                                                                 |
| Beta-pinene + OH → products                                         | $7.6 \times 10^{-11}$          |                                                                                                 |
| Delta-3-Carene + OH → products                                      | $9 \times 10^{-11}$            | (Atkinson et al., 1986; Grosjean and Williams, 1992)                                            |
| Myrcene + OH → products                                             | $2.2 \times 10^{-10}$          | (Atkinson et al., 1986; Tan et al., 2021)                                                       |
| NO <sub>2</sub> + O <sub>3</sub> → NO <sub>3</sub> + O <sub>2</sub> | $3.2 \times 10^{-17}$          | (Atkinson et al., 2004; Ghormley et al., 1973)                                                  |
| NO <sub>3</sub> + NO <sub>2</sub> → N <sub>2</sub> O <sub>5</sub>   | $1.9 \times 10^{-12}$          | (Atkinson et al., 2004)                                                                         |
| N <sub>2</sub> O <sub>5</sub> → NO <sub>3</sub> + NO <sub>2</sub>   | 0.07                           |                                                                                                 |
| NO <sub>3</sub> + OH → NO <sub>2</sub> + HO <sub>2</sub>            | $2 \times 10^{-11}$            |                                                                                                 |
| O <sub>3</sub> + OH → O <sub>2</sub> + HO <sub>2</sub>              | $7.3 \times 10^{-14}$          |                                                                                                 |
| NO <sub>2</sub> + OH → HNO <sub>3</sub>                             | $2.4 \times 10^{-11}$          | (D’Ottone et al., 2001)                                                                         |
| NO <sub>3</sub> → Wall (inner diameter: 4 cm)                       | 0.1                            | (Lambe et al., 2020)                                                                            |
| NO <sub>3</sub> → Wall (inner diameter: 8 mm)                       | 0.24                           |                                                                                                 |
| N <sub>2</sub> O <sub>5</sub> → Wall (inner diameter: 4 cm)         | 0.04                           |                                                                                                 |
| N <sub>2</sub> O <sub>5</sub> → Wall (inner diameter: 8 mm)         | 1                              |                                                                                                 |

<sup>a</sup> Units: cm<sup>3</sup> molecule<sup>-1</sup> s<sup>-1</sup> (bimolecular reactions) or s<sup>-1</sup> (unimolecular reactions).

## Reference

- 175 Archer, S. L., Shultz, P. J., Warren, J. B., Hampl, V., and DeMaster, E. G.: Preparation of Standards and Measurement of Nitric Oxide, Nitroxy, and Related Oxidation Products, *Methods*, 7, 21–34, <https://doi.org/10.1006/meth.1995.1004>, 1995.
- Aschmann, S. M., Arey, J., and Atkinson, R.: OH radical formation from the gas-phase reactions of O<sub>3</sub> with a series of terpenes, *Atmos. Environ.*, 36, 4347–4355, [https://doi.org/10.1016/S1352-2310\(02\)00355-2](https://doi.org/10.1016/S1352-2310(02)00355-2), 2002.
- 180 Atkinson, R., Plum, C. N., Carter, W. P. L., Winer, A. M., and Pitts, J. N. Jr.: Rate constants for the gas-phase reactions of nitrate radicals with a series of organics in air at 298 ± 1 K, *J. Phys. Chem.*, 88, 1210–1215, <https://doi.org/10.1021/j150650a039>, 1984.
- Atkinson, R., Aschmann, S. M., and Pitts, J. N.: Rate constants for the gas-phase reactions of the OH radical with a series of monoterpenes at 294 ± 1 K, *Int. J. Chem. Kinet.*, 18, 287–299, <https://doi.org/10.1002/kin.550180303>, 1986.
- 185 Atkinson, R., Hasegawa, D., and Aschmann, S. M.: Rate constants for the gas-phase reactions of O<sub>3</sub> with a series of monoterpenes and related compounds at 296 ± 2 K, *Int. J. Chem. Kinet.*, 22, 871–887, <https://doi.org/10.1002/kin.550220807>, 1990.
- Atkinson, R., Aschmann, S. M., Arey, J., and Shorees, B.: Formation of OH radicals in the gas phase reactions of O<sub>3</sub> with a series of terpenes, *J. Geophys. Res. Atmos.*, 97, 6065–6073, <https://doi.org/10.1029/92JD00062>, 1992.
- 190 Atkinson, R., Baulch, D. L., Cox, R. A., Crowley, J. N., Hampson, R. F., Hynes, R. G., Jenkin, M. E., Rossi, M. J., and Troe, J.: Evaluated kinetic and photochemical data for atmospheric chemistry: Volume I - gas phase reactions of O<sub>x</sub>, HO<sub>x</sub>, NO<sub>x</sub> and SO<sub>x</sub> species, *Atmos. Chem. Phys.*, 4, 1461–1738, <https://doi.org/10.5194/acp-4-1461-2004>, 2004.
- Barnes, Ian., Bastian, Volker., Becker, K. H., and Tong, Zhu.: Kinetics and products of the reactions of nitrate radical with monoalkenes, dialkenes, and monoterpenes, *J. Phys. Chem.*, 94, 2413–2419, <https://doi.org/10.1021/j100369a041>, 1990.
- 195 Bernard, F., Fedioun, I., Peyroux, F., Quilgars, A., Daële, V., and Mellouki, A.: Thresholds of secondary organic aerosol formation by ozonolysis of monoterpenes measured in a laminar flow aerosol reactor, *J. Aerosol Sci.*, 43, 14–30, <https://doi.org/10.1016/j.jaerosci.2011.08.005>, 2012.
- Berndt, T., Richters, S., Kaethner, R., Voigtländer, J., Stratmann, F., Sipilä, M., Kulmala, M., and Herrmann, H.: Gas-Phase Ozonolysis of Cycloalkenes: Formation of Highly Oxidized RO<sub>2</sub> Radicals and Their Reactions with NO, NO<sub>2</sub>, SO<sub>2</sub>, and Other RO<sub>2</sub> Radicals, *J. Phys. Chem. A*, 119, 10336–10348, <https://doi.org/10.1021/acs.jpca.5b07295>, 2015a.
- 200 Berndt, T., Kaethner, R., Voigtländer, J., Stratmann, F., Pfeifle, M., Reichle, P., Sipilä, M., Kulmala, M., and Olzmann, M.: Kinetics of the unimolecular reaction of CH<sub>2</sub>OO and the bimolecular reactions with the water monomer, acetaldehyde and acetone under atmospheric conditions, *Phys. Chem. Chem. Phys.*, 17, 19862–19873, <https://doi.org/10.1039/C5CP02224J>, 2015b.
- 205 Berndt, T., Richters, S., Jokinen, T., Hyttinen, N., Kurtén, T., Otkjær, R. V., Kjaergaard, H. G., Stratmann, F., Herrmann, H., Sipilä, M., Kulmala, M., and Ehn, M.: Hydroxyl radical-induced formation of highly oxidized organic compounds, *Nat. Commun.*, 7, 13677, <https://doi.org/10.1038/ncomms13677>, 2016.
- Berndt, T., Mentler, B., Scholz, W., Fischer, L., Herrmann, H., Kulmala, M., and Hansel, A.: Accretion Product Formation from Ozonolysis and OH Radical Reaction of α-Pinene: Mechanistic Insight and the Influence of Isoprene and Ethylene, *Environ. Sci. Technol.*, 52, 11069–11077, <https://doi.org/10.1021/acs.est.8b02210>, 2018.

- 210 Berndt, T., Hoffmann, E. H., Tilgner, A., and Herrmann, H.: Highly oxidized products from the atmospheric reaction of hydroxyl radicals with isoprene, *Nat. Commun.*, 16, 2068, <https://doi.org/10.1038/s41467-025-57336-1>, 2025.
- D'Ottone, L., Campuzano-Jost, P., Bauer, D., and Hynes, A. J.: A Pulsed Laser Photolysis–Pulsed Laser Induced Fluorescence Study of the Kinetics of the Gas-Phase Reaction of OH with NO<sub>2</sub>, *J. Phys. Chem. A*, 105, 10538–10543, <https://doi.org/10.1021/jp012250n>, 2001.
- 215 Draper, D. C., Myllys, N., Hyttinen, N., Møller, K. H., Kjaergaard, H. G., Fry, J. L., Smith, J. N., and Kurtén, T.: Formation of Highly Oxidized Molecules from NO<sub>3</sub> Radical Initiated Oxidation of  $\Delta$ -3-Carene: A Mechanistic Study, *ACS Earth Space Chem.*, 3, 1460–1470, <https://doi.org/10.1021/acsearthspacechem.9b00143>, 2019.
- Eisele, F. L. and Tanner, D. J.: Measurement of the gas phase concentration of H<sub>2</sub>SO<sub>4</sub> and methane sulfonic acid and estimates of H<sub>2</sub>SO<sub>4</sub> production and loss in the atmosphere, *J. Geophys. Res.*, 98, 9001–9010, <https://doi.org/10.1029/93JD00031>, 1993.
- 220 Ghormley, J. A., Ellsworth, R. L., and Hochanadel, C. J.: Reaction of excited oxygen atoms with nitrous oxide. Rate constants for reaction of ozone with nitric oxide and with nitrogen dioxide, *J. Phys. Chem.*, 77, 1341–1345, <https://doi.org/10.1021/j100630a005>, 1973.
- Gill, K. J. and Hites, R. A.: Rate Constants for the Gas-Phase Reactions of the Hydroxyl Radical with Isoprene,  $\alpha$ - and  $\beta$ -Pinene, and Limonene as a Function of Temperature, *J. Phys. Chem. A*, 106, 2538–2544, <https://doi.org/10.1021/jp013532q>, 2002.
- 225 Grosjean, D. and Williams, E. L.: Environmental persistence of organic compounds estimated from structure-reactivity and linear free-energy relationships. Unsaturated aliphatics, *Atmos. Environ. Part A*, 26, 1395–1405, [https://doi.org/10.1016/0960-1686\(92\)90124-4](https://doi.org/10.1016/0960-1686(92)90124-4), 1992.
- 230 He, X.-C., Shen, J., Iyer, S., Juuti, P., Zhang, J., Koirala, M., Kytökari, M. M., Worsnop, D. R., Rissanen, M., Kulmala, M., Maier, N. M., Mikkilä, J., Sipilä, M., and Kangasluoma, J.: Characterisation of gaseous iodine species detection using the multi-scheme chemical ionisation inlet 2 with bromide and nitrate chemical ionisation methods, *Atmos. Meas. Tech.*, 16, 4461–4487, <https://doi.org/10.5194/amt-16-4461-2023>, 2023.
- Junninen, H., Ehn, M., Petäjä, T., Luosujärvi, L., Kotiaho, T., Kostianinen, R., Rohner, U., Gonin, M., Fuhrer, K., Kulmala, M., and Worsnop, D. R.: A high-resolution mass spectrometer to measure atmospheric ion composition, *Atmos. Meas. Tech.*, 3, 1039–1053, <https://doi.org/10.5194/amt-3-1039-2010>, 2010.
- 235 Krechmer, J., Lopez-Hilfiker, F., Koss, A., Hutterli, M., Stoerner, C., Deming, B., Kimmel, J., Warneke, C., Holzinger, R., Jayne, J., Worsnop, D., Fuhrer, K., Gonin, M., and de Gouw, J.: Evaluation of a New Reagent-Ion Source and Focusing Ion–Molecule Reactor for Use in Proton-Transfer-Reaction Mass Spectrometry, *Anal. Chem.*, 90, 12011–12018, <https://doi.org/10.1021/acs.analchem.8b02641>, 2018.
- 240 Kürten, A., Rondo, L., Ehrhart, S., and Curtius, J.: Calibration of a Chemical Ionization Mass Spectrometer for the Measurement of Gaseous Sulfuric Acid, *J. Phys. Chem. A*, 116, 6375–6386, <https://doi.org/10.1021/jp212123n>, 2012.
- Kurtén, T., Møller, K. H., Nguyen, T. B., Schwantes, R. H., Misztal, P. K., Su, L., Wennberg, P. O., Fry, J. L., and Kjaergaard, H. G.: Alkoxy Radical Bond Scissions Explain the Anomalously Low Secondary Organic Aerosol and Organonitrate Yields From  $\alpha$ -Pinene + NO<sub>3</sub>, *J. Phys. Chem. Lett.*, 8, 2826–2834, <https://doi.org/10.1021/acs.jpclett.7b01038>, 2017.
- 245 Lambe, A. T., Wood, E. C., Krechmer, J. E., Majluf, F., Williams, L. R., Croteau, P. L., Cirtog, M., Féron, A., Petit, J.-E., Albinet, A., Jimenez, J. L., and Peng, Z.: Nitrate radical generation via continuous generation of dinitrogen pentoxide in a

- laminar flow reactor coupled to an oxidation flow reactor, *Atmos. Meas. Tech.*, 13, 2397–2411, <https://doi.org/10.5194/amt-13-2397-2020>, 2020.
- 250 Martínez, E., Cabañas, B., Aranda, A., Martín, P., and Salgado, S.: Absolute Rate Coefficients for the Gas-Phase Reactions of NO<sub>3</sub> Radical with a Series of Monoterpenes at T = 298 to 433 K, *J. Atmos. Chem.*, 33, 265–282, <https://doi.org/10.1023/A:1006178530211>, 1999.
- Tan, Z., Hantschke, L., Kaminski, M., Acir, I.-H., Bohn, B., Cho, C., Dorn, H.-P., Li, X., Novelli, A., Nehr, S., Rohrer, F., Tillmann, R., Wegener, R., Hofzumahaus, A., Kiendler-Scharr, A., Wahner, A., and Fuchs, H.: Atmospheric photo-oxidation of myrcene: OH reaction rate constant, gas-phase oxidation products and radical budgets, *Atmos. Chem. Phys.*, 21, 16067–16091, <https://doi.org/10.5194/acp-21-16067-2021>, 2021.
- 255 Witter, M., Berndt, T., Böge, O., Stratmann, F., and Heintzenberg, J.: Gas-phase ozonolysis: Rate coefficients for a series of terpenes and rate coefficients and OH yields for 2-methyl-2-butene and 2,3-dimethyl-2-butene, *Int. J. Chem. Kinet.*, 34, 394–403, <https://doi.org/10.1002/kin.10063>, 2002.
- 260 Zhang, J., Zhang, Y., Koskenvaara, H., Zhao, J., and Ehn, M.: Dataset for article “Gas-phase products from nitrate radical oxidation of five monoterpenes: insights from free-jet flow-tube experiments,” Zenodo [data set] [dataset], <https://doi.org/10.5281/zenodo.17250833>, 2025.
- Zhao, J. and Zhang, R.: Proton transfer reaction rate constants between hydronium ion (H<sub>3</sub>O<sup>+</sup>) and volatile organic compounds, *Atmos. Environ.*, 38, 2177–2185, <https://doi.org/10.1016/j.atmosenv.2004.01.019>, 2004.
